# Supplementary material for: Genome-wide identification of binding sites for NAC and YABBY transcription factors and co-regulated genes during soybean seedling development by ChIP-Seq and RNA-Seq
Source: Springer Nature journal article supplement (doi:10.1186/1471-2164-14-477), 2013-01-01
Supplement: 12864_2013_5189_MOESM8_ESM.pdf [file 12864_2013_5189_MOESM8_ESM.pdf]

Yellow Cotyledons

Functional Transition Yellow to Green

Green Cotyledons

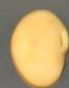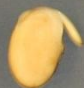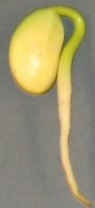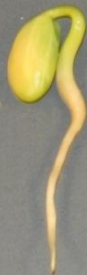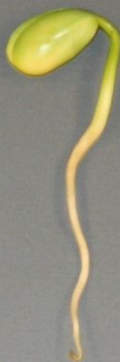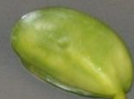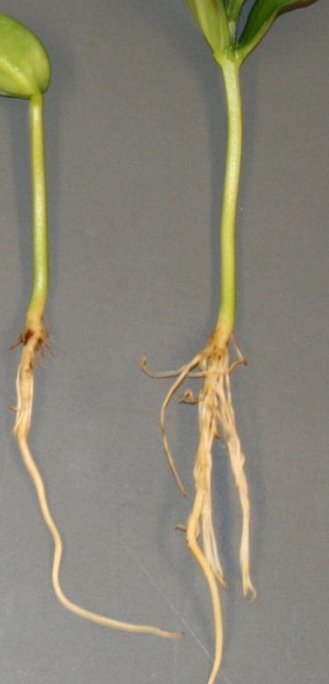

Stage-1

Stage-2

Stage-3

Stage-4

Stage-5

Stage-6

Stage-7
