# Supplementary material for: Genome-wide identification of binding sites for NAC and YABBY transcription factors and co-regulated genes during soybean seedling development by ChIP-Seq and RNA-Seq
Source: Springer Nature journal article supplement (doi:10.1186/1471-2164-14-477), 2013-01-01

**(a) Distribution of NAC TF Binding Sites**

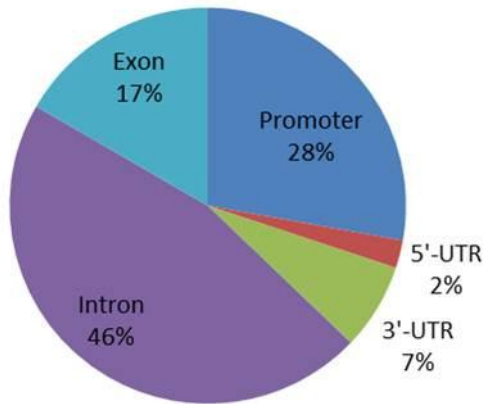

**(b) Distribution of YABBY TF Binding Sites**

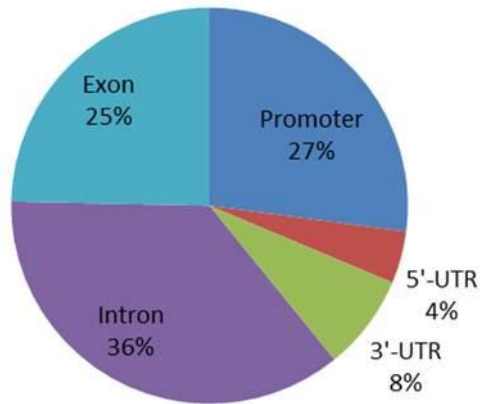

Supplement: 12864_2013_5189_MOESM12_ESM.pdf [file 12864_2013_5189_MOESM12_ESM.pdf]
