# Supplementary material for: Genome-wide identification of binding sites for NAC and YABBY transcription factors and co-regulated genes during soybean seedling development by ChIP-Seq and RNA-Seq
Source: Springer Nature journal article supplement (doi:10.1186/1471-2164-14-477), 2013-01-01

(a) Potential NAC TF Binding Motif1

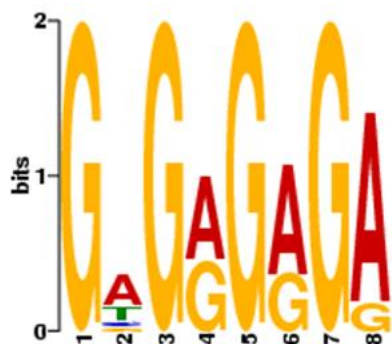

(d) Potential YABBY TF Binding Motif1

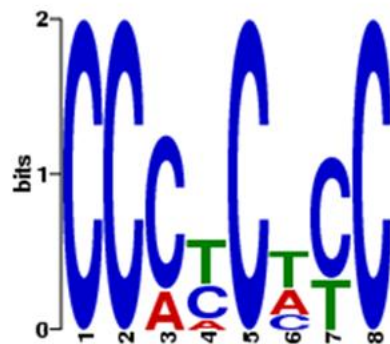

(b) Potential NAC TF Binding Motif2

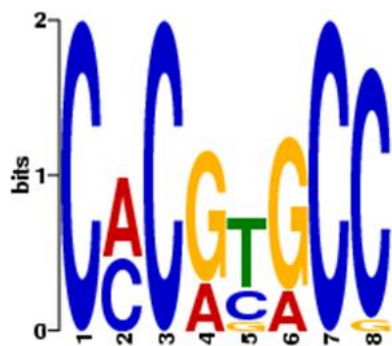

(e) Potential YABBY TF Binding Motif2

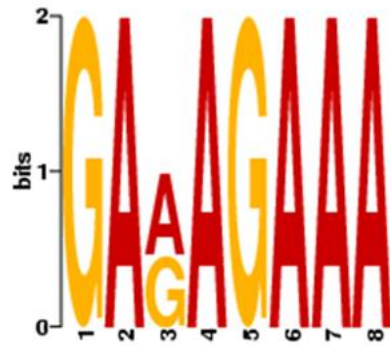

(c) Potential NAC TF Binding Motif3

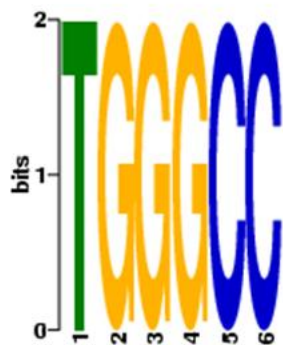

(f) Potential YABBY family TF Binding Motif3

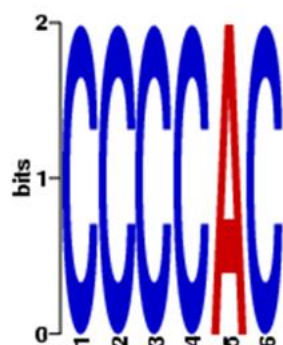

Supplement: 12864_2013_5189_MOESM14_ESM.pdf [file 12864_2013_5189_MOESM14_ESM.pdf]
