# Supplementary material for: Genome-wide identification of binding sites for NAC and YABBY transcription factors and co-regulated genes during soybean seedling development by ChIP-Seq and RNA-Seq
Source: Springer Nature journal article supplement (doi:10.1186/1471-2164-14-477), 2013-01-01

- (a) ChIP-Seq peaks for NAC transcription factor binding sites within DEAD/DEAH box helicase gene (Glyma07g07950) promoter.

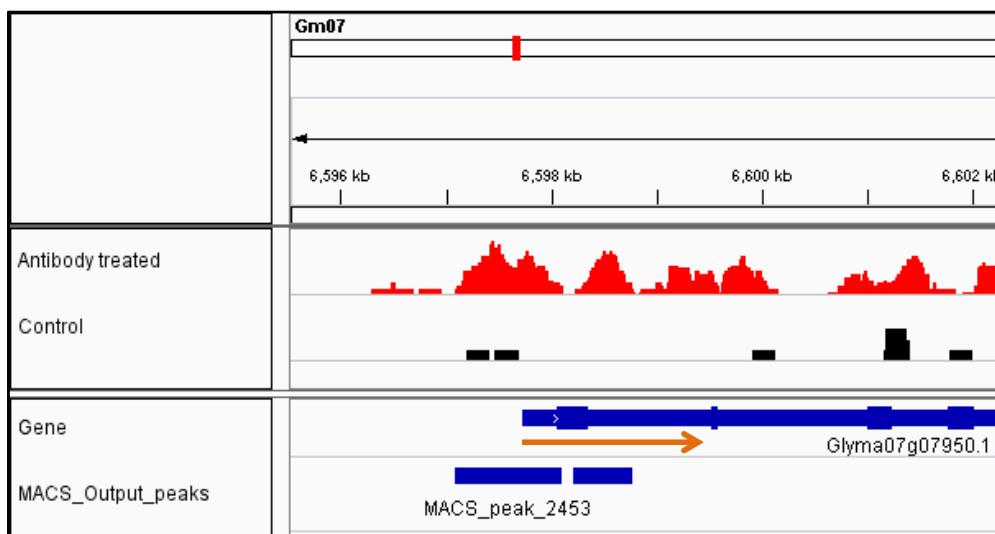

- (b) ChIP-Seq peaks for YABBY transcription factor binding sites within AP2 gene (Glyma02g08840) promoter.

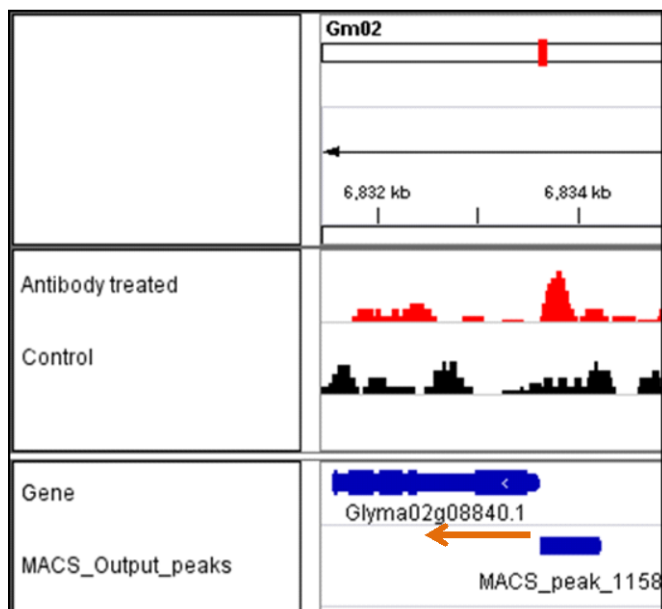

Supplement: 12864_2013_5189_MOESM15_ESM.pdf [file 12864_2013_5189_MOESM15_ESM.pdf]
